# Supplementary material
Source: PubMed Central journal article supplement (PMC6758544)
Supplement: NIHMS1048869-supplement-2.pdf [file NIHMS1048869-supplement-2.pdf]

### Upload Query

Query Compound

### Run HTDocking

High throughput docking technique

### Run TargetHunter

Fingerprints-based similarity search

### Run BBB Predictor

In silico prediction for BBB permeability

### Target Classification

Machine learning-based target identification

### Drug-Target Spider Plot

Network-based computational systems pharmacology analysis tool
